# Supplementary material for: Pertussis surveillance results from a French general practitioner network, France, 2017 to 2020
Source: PubMed Central journal article supplement (PMC9052767; doi:10.2807/1560-7917.es.2022.27.17.2100515), 2022-04-28
Supplement: 2100515_SupplementaryMaterials.pdf [file 2100515_SupplementaryMaterials.pdf]

## Supplementary Table S1: Description of pertussis cases per year, from 2017 to 2020

This supplementary material is hosted by Eurosurveillance as supporting information alongside the article [Pertussis surveillance results from a French general practitioner network, France, 2017 to 2020], on behalf of the authors, who remain responsible for the accuracy and appropriateness of the content. The same standards for ethics, copyright, attributions and permissions as for the article apply. Supplements are not edited by Eurosurveillance and the journal is not responsible for the maintenance of any links or email addresses provided therein.

|                                                                        | 2017                        |     | 2018                  |     | 2019                    |     | 2020                   |     |
|------------------------------------------------------------------------|-----------------------------|-----|-----------------------|-----|-------------------------|-----|------------------------|-----|
|                                                                        | N                           | %   | N                     | %   | N                       | %   | N                      | %   |
| <b>Total</b>                                                           | <b>46</b>                   |     | <b>29</b>             |     | <b>46</b>               |     | <b>11</b>              |     |
| Laboratory confirmed case                                              | 39                          | 85  | 23                    | 79  | 38                      | 83  | 9                      | 82  |
| Epidemiological case                                                   | 7                           | 15  | 6                     | 21  | 8                       | 17  | 2                      | 18  |
| <b>Clinical description</b>                                            |                             |     |                       |     |                         |     |                        |     |
| Age : median in years (min – max in years, m for months; IQR in years) | 17.5<br>(2m – 80;<br>35.75) |     | 31<br>(4 – 75;<br>34) |     | 37<br>(2 – 75;<br>37.5) |     | 18<br>(3m – 87;<br>43) |     |
| Sex (female)                                                           | 29                          | 63  | 20                    | 69  | 28                      | 61  | 6                      | 55  |
| Fever                                                                  | 18                          | 39  | 7                     | 25  | 6                       | 14  | 3                      | 27  |
| Hospitalization                                                        | 3                           | 7   | 0                     | 0   | 0                       | 0   | 1                      | 9   |
| Cough                                                                  | 46                          | 100 | 29                    | 100 | 46                      | 100 | 11                     | 100 |
| <b>Characteristics of the cough*</b>                                   |                             |     |                       |     |                         |     |                        |     |
| Predominantly nocturnal                                                | 36                          | 78  | 24                    | 83  | 34                      | 81  | 7                      | 64  |
| Cough with cough attacks                                               | 45                          | 98  | 29                    | 100 | 41                      | 89  | 7                      | 64  |
| Cough with frequent post-cough vomiting                                | 14                          | 31  | 10                    | 34  | 12                      | 27  | 3                      | 27  |
| Cough leading to difficult breathing                                   | 19                          | 41  | 12                    | 41  | 20                      | 44  | 3                      | 27  |
| Cough with cyanosis                                                    | 1                           | 2   | 1                     | 4   | 1                       | 2   | 2                      | 18  |
| Whooping cough                                                         | 6                           | 14  | 4                     | 14  | 14                      | 31  | 3                      | 27  |
| Apnea                                                                  | 7                           | 16  | 4                     | 14  | 3                       | 7   | 1                      | 10  |
| <b>Immunization status</b>                                             |                             |     |                       |     |                         |     |                        |     |
| Not vaccinated                                                         | 17                          | 44  | 11                    | 44  | 19                      | 51  | 7                      | 64  |
| Vaccinated                                                             | 22                          | 56  | 14                    | 56  | 18                      | 49  | 4                      | 36  |
| <b>Characteristics of vaccinated cases</b>                             |                             |     |                       |     |                         |     |                        |     |
| Unknown number of doses                                                | 7                           | 32  | 4                     | 29  | 7                       | 39  | 3                      | 75  |
| Number of doses known                                                  | 15                          | 68  | 10                    | 71  | 11                      | 61  | 1                      | 25  |
| 1 dose (n/number of doses known)                                       | 1                           | 7   | 0                     | 0   | 0                       | 0   | 0                      | 0   |
| 2 doses (n/number of doses known)                                      | 0                           | 0   | 0                     | 0   | 1                       | 9   | 0                      | 0   |
| 3 doses (n/number of doses known)                                      | 4                           | 27  | 2                     | 20  | 2                       | 18  | 0                      | 0   |
| 4 doses (n/number of doses known)                                      | 5                           | 33  | 2                     | 20  | 5                       | 45  | 1                      | 100 |
| > 4 doses (n/number of doses known)                                    | 5                           | 33  | 6                     | 60  | 3                       | 27  | 0                      | 0   |
| <b>Biology</b>                                                         |                             |     |                       |     |                         |     |                        |     |
| Culture prescribed                                                     | 3                           | 7   | 1                     | 4   | 1                       | 2   | 1                      | 9   |
| Culture performed (n/prescribed)                                       | 3                           | 100 | 1                     | 100 | 1                       | 100 | 1                      | 100 |
| Culture positive (n/performed)                                         | 3                           | 100 | 1                     | 100 | 1                       | 100 | 1                      | 100 |
| PCR prescribed                                                         | 40                          | 87  | 25                    | 86  | 38                      | 84  | 9                      | 82  |
| PCR performed (n/prescribed)                                           | 39                          | 100 | 24                    | 96  | 38                      | 100 | 9                      | 100 |
| PCR positive (n/performed)                                             | 36                          | 92  | 22                    | 92  | 37                      | 97  | 8                      | 89  |

Missing data for 2017: 1 (2%) for 'Cough with frequent post-cough vomiting', 4 (9%) for 'Cough with cyanosis', 4 (9%) for 'Whooping cough', 3 (7%) for 'Apnea', 7 (15%) for immunization status, 7 out of 22 (32%) for number of vaccine doses, 1 (2%) for PCR performed, 1 (2%) for culture prescription

Missing data for 2018: 1 (3%) for fever, 1 (3%) for hospitalization, 3 (10%) for 'Cough with cyanosis', 1 (3%) for 'Whooping cough', 1 (3%) for 'Apnea', 4 (14%) for immunization status, 4 out of 14 (29%) for number of vaccine doses, 1 (3%) for culture prescription

Missing data for 2019: 2 (4%) for fever, 3 (7%) for hospitalization, 4 (9%) for 'Predominantly nocturnal cough', 1 (2%) for 'Cough with frequent post-cough vomiting', 1 (2%) for 'Cough leading to difficult breathing', 1 (2%) for 'Cough with cyanosis', 1 (2%) for 'Whooping cough', 3 (7%) for 'Apnea', 9 (20%) for immunization status, 7 out of 18 (39%) for number of vaccine doses, 1 (2%) for PCR prescription, 3 (7%) for culture prescription

Missing data for 2020: 1 (9%) for 'Apnea', 3 out of 4 (75%) for number of vaccine doses

\* Several characteristics can describe a same case, so the sum of characteristics exceeds the total number of cases
